# Supplementary material
Source: PubMed Central journal article supplement (PMC3470619)
Supplement: supp_111823_fluo-juurlink-1-at.pdf [file supp_111823_fluo-juurlink-1-at.pdf]

## Appendix 1 (as supplied by the authors): Liver-related diagnosis and procedure codes

*International Statistical Classification of Diseases and Related Health Problems, Clinical Modification, 9th Revision (ICD9-CM) Diagnosis Codes (used until March 31, 2002)*

---

| <b>CODE</b> | <b>DESCRIPTION</b>              |
|-------------|---------------------------------|
| 0700        | HEPATITIS A WITH COMA           |
| 0701        | HEPATITIS A W/O COMA            |
| 07020       | VIR HEPB W HEP COMA W/O HEP DEL |
| 07021       | VIR HEPB W HEP COMA W HEP DELTA |
| 07030       | VIR HEPB W/O HEP COMA/HEP DELTA |
| 07031       | VIR HEPB W/O HEP COMA,W HEP DEL |
| 07041       | HEPATITIS C WITH HEPATIC COMA   |
| 07042       | HEP DEL W/O ACT HEPB W COMA     |
| 07043       | HEPATITIS E WITH HEPATIC COMA   |
| 07049       | OTH SPEC VIR HEP WITH HEP COMA  |
| 07051       | HEP C W/O MENTION HEP COMA      |
| 07052       | HEP DEL W/O ACT HEPB,W/O COMA   |
| 07053       | HEP E W/O MENTION HEP COMA      |
| 07059       | OTH SPEC VIR HEP WITH HEP COMA  |
| 0706        | VIRAL HEPAT NOS W COMA          |
| 0709        | VIRAL HEPAT NOS W/O COMA        |
| 1550        | MAL NEO LIVER, PRIMARY          |
| 1551        | MAL NEO INTRAHEPAT DUCTS        |
| 1552        | MALIGNANT NEO LIVER NOS         |
| 1980        | SECOND MALIG NEO KIDNEY         |
| 2115        | BEN NEO LIVER/BILE DUCTS        |
| 2308        | CA IN SITU LIVER/BILIARY        |
| 2353        | UNC BEHAV NEO LIVER             |
| 570         | ACUTE NECROSIS OF LIVER         |
| 5710        | ALCOHOLIC FATTY LIVER           |
| 5711        | AC ALCOHOLIC HEPATITIS          |
| 5712        | ALCOHOL CIRRHOSIS LIVER         |
| 5713        | ALCOHOL LIVER DAMAGE NOS        |
| 57140       | CHRONIC HEPATITIS NOS           |
| 57141       | CHR PERSISTENT HEPATITIS        |
| 57149       | CHRONIC HEPATITIS NEC           |
| 5715        | CIRRHOSIS OF LIVER NOS          |
| 5716        | BILIARY CIRRHOSIS               |
| 5718        | CHRONIC LIVER DIS NEC           |
| 5719        | CHRONIC LIVER DIS NOS           |
| 5720        | ABSCCESS OF LIVER               |
| 5721        | PORTAL PYEMIA                   |
| 5722        | HEPATIC COMA                    |
| 5723        | PORTAL HYPERTENSION             |
| 5724        | HEPATORENAL SYNDROME            |
| 5728        | OTH SEQUELA, CHR LIV DIS        |
| 5730        | CHR PASSIV CONGEST LIVER        |
| 5731        | HEPATITIS IN VIRAL DIS          |

|       |                          |
|-------|--------------------------|
| 5732  | HEPATITIS IN OTH INF DIS |
| 5733  | HEPATITIS NOS            |
| 5734  | HEPATIC INFARCTION       |
| 5738  | LIVER DISORDERS NEC      |
| 5739  | LIVER DISORDER NOS       |
| 7824  | JAUNDICE NOS             |
| 7891  | HEPATOMEGALY             |
| 7948  | ABN LIVER FUNCTION STUDY |
| 99682 | TRANSPLANTED LIVER       |
| V026  | VIRAL HEPATITIS CARRIER  |
| V427  | LIVER TRANSPLANT STATUS  |
| V1007 | HX OF LIVER MALIGNANCY   |
| V113  | HX OF ALCOHOLISM         |

*International Statistical Classification of Diseases and Related Health Problems, 10th Revision, Canadian Enhancement (ICD10-CA) Diagnosis Codes (used from April 1, 2002)*

| <b>CODE</b> | <b>DESCRIPTION</b>                                                    |
|-------------|-----------------------------------------------------------------------|
| 81700       | LIVER CELL ADENOMA (D13.4)                                            |
| 81703       | HEPATOCELLULAR CARCINOMA NOS (C22.0)                                  |
| 81713       | HEPATOCELLULAR CARCINOMA, FIBROLAMELLAR (C22.0)                       |
| 81803       | COMBINED HEPATOCELLULAR CARCINOMA AND CHOLANGIOCARCINOMA (C22.0)      |
| B150        | HEPATITIS A WITH HEPATIC COMA                                         |
| B159        | HEPATITIS A WITHOUT HEPATIC COMA                                      |
| B160        | ACUTE HEPATITIS B WITH DELTA-AGENT (COINFECTION) WITH HEPATIC COMA    |
| B161        | ACUTE HEPATITIS B WITH DELTA-AGENT (COINFECTION) WITHOUT HEPATIC COMA |
| B162        | ACUTE HEPATITIS B WITHOUT DELTA-AGENT WITH HEPATIC COMA               |
| B169        | ACUTE HEPATITIS B WITHOUT DELTA-AGENT AND WITHOUT HEPATIC COMA        |
| B170        | ACUTE DELTA-(SUPER)INFECTION OF HEPATITIS B CARRIER                   |
| B171        | ACUTE HEPATITIS C                                                     |
| B172        | ACUTE HEPATITIS E                                                     |
| B178        | OTHER SPECIFIED ACUTE VIRAL HEPATITIS                                 |
| B180        | CHRONIC VIRAL HEPATITIS B WITH DELTA-AGENT                            |
| B181        | CHRONIC VIRAL HEPATITIS B WITHOUT DELTA-AGENT                         |
| B182        | CHRONIC VIRAL HEPATITIS C                                             |
| B188        | OTHER CHRONIC VIRAL HEPATITIS                                         |
| B189        | CHRONIC VIRAL HEPATITIS, UNSPECIFIED                                  |
| B190        | UNSPECIFIED VIRAL HEPATITIS HEPATIC WITH COMA                         |
| B199        | UNSPECIFIED VIRAL HEPATITIS WITHOUT HEPATIC COMA                      |
| C220        | LIVER CELL CARCINOMA                                                  |
| C221        | INTRAHEPATIC BILE DUCT CARCINOMA                                      |
| C222        | HEPATOBLASTOMA                                                        |
| C223        | ANGIOSARCOMA OF LIVER                                                 |
| C224        | OTHER SARCOMAS OF LIVER                                               |
| C227        | OTHER SPECIFIED CARCINOMAS OF LIVER                                   |
| C229        | MALIGNANT NEOPLASM OF LIVER UNSPECIFIED                               |
| C787        | SECONDARY MALIGNANT NEOPLASM OF LIVER                                 |
| D015        | CARCINOMA IN SITU OF LIVER, GALLBLADDER AND BILE DUCTS                |
| D134        | BENIGN NEOPLASM OF LIVER                                              |

D376 NEOPLASM OF UNCERTAIN OR UNKNOWN BEHAVIOUR OF LIVER, GALLBLADDER  
 AND BILE DUCTS  
 K700 ALCOHOLIC FATTY LIVER  
 K701 ALCOHOLIC HEPATITIS  
 K702 ALCOHOLIC FIBROSIS AND SCLEROSIS OF LIVER  
 K703 ALCOHOLIC CIRRHOSIS OF LIVER  
 K704 ALCOHOLIC HEPATIC FAILURE  
 K709 ALCOHOLIC LIVER DISEASE, UNSPECIFIED  
 K710 TOXIC LIVER DISEASE WITH CHOLESTASIS  
 K711 TOXIC LIVER DISEASE WITH HEPATIC NECROSIS  
 K712 TOXIC LIVER DISEASE WITH ACUTE HEPATITIS  
 K713 TOXIC LIVER DISEASE WITH CHRONIC PERSISTENT HEPATITIS  
 K714 TOXIC LIVER DISEASE WITH CHRONIC LOBULAR HEPATITIS  
 K715 TOXIC LIVER DISEASE WITH CHRONIC ACTIVE HEPATITIS  
 K716 TOXIC LIVER DISEASE WITH HEPATITIS, NOT ELSEWHERE CLASSIFIED  
 K717 TOXIC LIVER DISEASE WITH FIBROSIS AND CIRRHOSIS OF LIVER  
 K718 TOXIC LIVER DISEASE WITH OTHER DISORDERS OF LIVER  
 K719 TOXIC LIVER DISEASE, UNSPECIFIED  
 K720 ACUTE AND SUBACUTE HEPATIC FAILURE  
 K721 CHRONIC HEPATIC FAILURE  
 K729 HEPATIC FAILURE, UNSPECIFIED  
 K730 CHRONIC PERSISTENT HEPATITIS, NOT ELSEWHERE CLASSIFIED  
 K731 CHRONIC LOBULAR HEPATITIS, NOT ELSEWHERE CLASSIFIED  
 K732 CHRONIC ACTIVE HEPATITIS, NOT ELSEWHERE CLASSIFIED  
 K738 OTHER CHRONIC HEPATITIS, NOT ELSEWHERE CLASSIFIED  
 K739 CHRONIC HEPATITIS, UNSPECIFIED  
 K740 HEPATIC FIBROSIS  
 K741 HEPATIC SCLEROSIS  
 K742 HEPATIC FIBROSIS WITH HEPATIC SCLEROSIS  
 K743 PRIMARY BILIARY CIRRHOSIS  
 K744 SECONDARY BILIARY CIRRHOSIS  
 K745 BILIARY CIRRHOSIS, UNSPECIFIED  
 K746 OTHER AND UNSPECIFIED CIRRHOSIS OF LIVER  
 K750 ABSCESS OF LIVER  
 K751 PHLEBITIS OF PORTAL VEIN  
 K752 NONSPECIFIC REACTIVE HEPATITIS  
 K753 GRANULOMATOUS HEPATITIS, NOT ELSEWHERE CLASSIFIED  
 K754 AUTOIMMUNE HEPATITIS  
 K758 OTHER SPECIFIED INFLAMMATORY LIVER DISEASES  
 K759 INFLAMMATORY LIVER DISEASE, UNSPECIFIED  
 K760 FATTY (CHANGE OF) LIVER, NOT ELSEWHERE CLASSIFIED  
 K761 CHRONIC PASSIVE CONGESTION OF LIVER  
 K762 CENTRAL HAEMORRHAGIC NECROSIS OF LIVER  
 K763 INFARCTION OF LIVER  
 K764 PELIOSIS HEPATIS  
 K765 HEPATIC VENO-OCCLUSIVE DISEASE  
 K766 PORTAL HYPERTENSION  
 K767 HEPATORENAL SYNDROME  
 K768 OTHER SPECIFIED DISEASES OF LIVER

|        |                                                                    |
|--------|--------------------------------------------------------------------|
| K769   | LIVER DISEASE, UNSPECIFIED                                         |
|        | LIVER DISORDERS IN INFECTIOUS AND PARASITIC DISEASES CLASSIFIED    |
| K770   | ELSEWHERE                                                          |
| K778   | LIVER DISORDERS IN OTHER DISEASES CLASSIFIED ELSEWHERE             |
| R160   | HEPATOMEGALY, NOT ELSEWHERE CLASSIFIED                             |
| R162   | HEPATOMEGALY WITH SPLENOMEGALY, NOT ELSEWHERE CLASSIFIED           |
| R17    | UNSPECIFIED JAUNDICE                                               |
| R932   | ABNORMAL FINDINGS ON DIAGNOSTIC IMAGING OF LIVER AND BILIARY TRACT |
| R945   | ABNORMAL RESULTS OF LIVER FUNCTION STUDIES                         |
| T86400 | LIVER TRANSPLANT REJECTION                                         |
| T86401 | LIVER TRANSPLANT FAILURE                                           |
| T86402 | LIVER TRANSPLANT INFECTION                                         |
| Z2250  | CARRIER OF VIRAL HEPATITIS B                                       |
| Z2251  | CARRIER OF VIRAL HEPATITIS C                                       |
| Z2258  | CARRIER OF OTHER VIRAL HEPATITIS                                   |
| Z246   | NEED FOR IMMUNIZATION AGAINST VIRAL HEPATITIS                      |
| Z526   | LIVER DONOR                                                        |
| Z944   | LIVER TRANSPLANT STATUS                                            |

Ontario Health Insurance Plan Physician Service Claim Diagnosis Codes

| <b>CODE</b> | <b>DESCRIPTION</b>                                 |
|-------------|----------------------------------------------------|
| 155         | PRIMARY MALIGNANCY OF LIVER (NOT SECONDARY SPREAD) |
| 571         | CIRRHOSIS OF THE LIVER, E.G. ALCOHOLIC CIRRHOSIS   |
| 573         | OTHER DISEASES OF THE LIVER                        |
| 964         | HEPATITIS B                                        |
| 070         | VIRAL HEPATITIS                                    |

Canadian Classification of Diagnostic, Therapeutic and Surgical Procedures (CCP) Procedure Codes  
(used until March 31, 2002)

| <b>CODE</b> | <b>DESCRIPTION</b>                                                                                             |
|-------------|----------------------------------------------------------------------------------------------------------------|
| 04.9        | MICROSCOPIC EXAMINATION OF SPECIMEN FROM LIVER, BILIARY TRACT, AND PANCREAS                                    |
| 04.91       | MICROSCOPIC EXAMINATION OF SPECIMEN FROM LIVER, BILIARY TRACT, AND PANCREAS, BACTERIAL SMEAR                   |
| 04.92       | MICROSCOPIC EXAMINATION OF SPECIMEN FROM LIVER, BILIARY TRACT, AND PANCREAS, CULTURE                           |
| 04.93       | MICROSCOPIC EXAMINATION OF SPECIMEN FROM LIVER, BILIARY TRACT, AND PANCREAS, CULTURE AND SENSITIVITY           |
| 04.94       | MICROSCOPIC EXAMINATION OF SPECIMEN FROM LIVER, BILIARY TRACT, AND PANCREAS, PARASITOLOGY                      |
| 04.95       | MICROSCOPIC EXAMINATION OF SPECIMEN FROM LIVER, BILIARY TRACT, AND PANCREAS, TOXICOLOGY                        |
| 04.96       | MICROSCOPIC EXAMINATION OF SPECIMEN FROM LIVER, BILIARY TRACT, AND PANCREAS, CELL BLOCK AND PAPANICOLAOU SMEAR |
| 04.99       | MICROSCOPIC EXAMINATION OF SPECIMEN FROM LIVER, BILIARY TRACT, AND PANCREAS, OTHER MICROSCOPIC EXAMINATION     |
| 06.02       | LIVER RADIOISOTOPE SCAN AND FUNCTION STUDY                                                                     |

|       |                                                            |
|-------|------------------------------------------------------------|
| 62    | OPERATIONS ON LIVER                                        |
| 62.0  | HEPATOTOMY                                                 |
| 62.1  | LOCAL EXCISION OR DESTRUCTION OF LESION OR TISSUE OF LIVER |
| 62.11 | MARSUPIALIZATION OF LESION OF LIVER                        |
| 62.12 | PARTIAL HEPATECTOMY                                        |
| 62.19 | OTHER DESTRUCTION OF LESION OF LIVER                       |
| 62.2  | LOBECTOMY OF LIVER                                         |
| 62.3  | TOTAL HEPATECTOMY                                          |
| 62.4  | LIVER TRANSPLANT                                           |
| 62.41 | AUXILIARY LIVER TRANSPLANT                                 |
| 62.49 | OTHER TRANSPLANT OF LIVER                                  |
| 62.5  | REPAIR OF LIVER                                            |
| 62.51 | SUTURE OF LIVER                                            |
| 62.52 | HEPATOSTOMY                                                |
| 62.59 | OTHER REPAIR OF LIVER                                      |
| 62.8  | INVASIVE DIAGNOSTIC PROCEDURES ON LIVER                    |
| 62.81 | PERCUTANEOUS BIOPSY OF LIVER                               |
| 62.82 | OTHER BIOPSY OF LIVER                                      |
| 62.89 | OTHER INVASIVE DIAGNOSTIC PROCEDURES ON LIVER              |
| 62.9  | OTHER OPERATIONS ON LIVER                                  |
| 62.91 | PERCUTANEOUS ASPIRATION OF LIVER                           |
| 62.92 | EXTRACORPOREAL HEPATIC ASSISTANCE                          |
| 62.93 | LOCALIZED PERFUSION OF LIVER                               |
| 62.94 | OTHER INJECTION OF THERAPEUTIC SUBSTANCE INTO LIVER        |
| 62.99 | OTHER OPERATIONS ON LIVER NEC                              |

Canadian Classification of Health Interventions (CCI) Procedure Codes (used from April 1, 2002)

| <b>CODE</b> | <b>DESCRIPTION</b>                                                                                                                                            |
|-------------|---------------------------------------------------------------------------------------------------------------------------------------------------------------|
| 10A13DAAG   | CONTROL OF BLEEDING, LIVER ENDOSCOPIC [LAPAROSCOPIC] APPROACH AND LASER COAGULATION                                                                           |
| 10A13DAW2   | CONTROL OF BLEEDING, LIVER ENDOSCOPIC [LAPAROSCOPIC] APPROACH AND COLLAGEN POWDER                                                                             |
| 10A13DAW3   | CONTROL OF BLEEDING, LIVER ENDOSCOPIC [LAPAROSCOPIC] APPROACH AND FIBRIN GLUE                                                                                 |
| 10A13DAX7   | CONTROL OF BLEEDING, LIVER ENDOSCOPIC [LAPAROSCOPIC] APPROACH AND CHEMICAL CAUTERY AGENT                                                                      |
| 10A13DAXXN  | CONTROL OF BLEEDING, LIVER ENDOSCOPIC [LAPAROSCOPIC] APPROACH AND SYNTHETIC TISSUE [E.G. MESH, TEFLON FELT]                                                   |
| 10A13GQGE   | CONTROL OF BLEEDING, LIVER PERCUTANEOUS TRANSLUMINAL APPROACH AND [DETACHABLE]COILS                                                                           |
| 10A13GQW0   | CONTROL OF BLEEDING, LIVER PERCUTANEOUS TRANSLUMINAL APPROACH AND SYNTHETIC AGENT [E.G. POLYVINYL ALCOHOL, MICROSPHERES, SILICONE, GELATIN FOAM, POLYSTYRENE] |
| 10A13LA     | CONTROL OF BLEEDING, LIVER USING OPEN APPROACH (WITH MANUAL PRESSURE OR PACKING)                                                                              |
| 10A13LAAG   | CONTROL OF BLEEDING, LIVER USING OPEN APPROACH AND LASER COAGULATION                                                                                          |
| 10A13LAW2   | CONTROL OF BLEEDING, LIVER USING OPEN APPROACH AND COLLAGEN POWDER                                                                                            |

Appendix to: Paterson JM, Mamdani MM, Manno M, et al. Fluoroquinolone therapy and idiosyncratic acute liver injury: a population-based study. *CMAJ* 2012. DOI:10.1503/cmaj111823.  
Copyright © 2012 Canadian Medical Association or its licensors

|            |                                                                                                         |
|------------|---------------------------------------------------------------------------------------------------------|
| 10A13LAW3  | CONTROL OF BLEEDING, LIVER USING OPEN APPROACH AND FIBRIN GLUE                                          |
| 10A13LAX7  | CONTROL OF BLEEDING, LIVER USING OPEN APPROACH AND CHEMICAL CAUTERY AGENT                               |
| 10A13LAXXE | CONTROL OF BLEEDING, LIVER USING OPEN APPROACH AND LOCAL TRANSPOSITIONAL FLAP [E.G. OMENTAL PATCH]      |
| 10A13LAXXN | CONTROL OF BLEEDING, LIVER USING OPEN APPROACH AND SYNTHETIC TISSUE [E.G. MESH, TEFLON FELT]            |
| 10A16HAT9  | PERFUSION, LIVER USING PERCUTANEOUS (NEEDLE) APPROACH AND PHARMACOLOGICAL AGENT NEC                     |
| 10A27JA    | RADIATION LIVER USING EXTERNAL BEAM                                                                     |
| 10A35HAA5  | PHARMACOTHERAPY (LOCAL), LIVER PERCUTANEOUS (NEEDLE) APPROACH USING BILE AND LIVER THERAPEUTIC AGENT    |
| 10A35HAT9  | PHARMACOTHERAPY (LOCAL), LIVER PERCUTANEOUS (NEEDLE) APPROACH USING PHARMACOLOGICAL AGENT NEC           |
| 10A35HHA5  | PHARMACOTHERAPY (LOCAL), LIVER PERCUTANEOUS (TRANSCATHETER) APPROACH USING BILE AND LIVER THERAPY AGENT |
| 10A35HHT9  | PHARMACOTHERAPY (LOCAL), LIVER PERCUTANEOUS (TRANSCATHETER) APPROACH USING PHARMACOLOGICAL AGENT NEC    |
| 10A35LAM1  | PHARMACOTHERAPY (LOCAL), LIVER OPEN APPROACH USING ALKYLATING AGENT                                     |
| 10A52DA    | DRAINAGE, LIVER USING ENDOSCOPIC [LAPAROSCOPIC] APPROACH                                                |
| 10A52HA    | DRAINAGE, LIVER USING PERCUTANEOUS (NEEDLE) APPROACH                                                    |
| 10A52HATS  | DRAINAGE, LIVER USING PERCUTANEOUS [TRANS-ABDOMINAL] APPROACH LEAVING DRAINAGE TUBE IN SITU             |
| 10A52LA    | DRAINAGE, LIVER USING OPEN [ABDOMINAL] APPROACH                                                         |
| 10A52QV    | DRAINAGE, LIVER USING OPEN TRANSPLEURAL APPROACH                                                        |
| 10A53LAQK  | IMPLANTATION OF INTERNAL DEVICE, LIVER OF INFUSION PUMP USING OPEN APPROACH                             |
| 10A54JAQK  | MANAGEMENT OF INTERNAL DEVICE, LIVER OF INFUSION PUMP                                                   |
| 10A54JATS  | MANAGEMENT OF INTERNAL DEVICE, LIVER OF DRAINAGE TUBE                                                   |
| 10A55HATS  | REMOVAL OF DEVICE, LIVER OF DRAINAGE TUBE [CATHETER] INSERTED PERCUTANEOUSLY                            |
| 10A55LAQK  | REMOVAL OF DEVICE, LIVER OF INFUSION PUMP USING OPEN APPROACH                                           |
| 10A56LA    | REMOVAL OF FOREIGN BODY, LIVER USING OPEN APPROACH                                                      |
| 10A58LAXXK | PROCUREMENT, LIVER OF ENTIRE CADAVER DONOR LIVER                                                        |
| 10A58WLXXJ | PROCUREMENT, LIVER OF SPLIT LIVING DONOR LIVER                                                          |
| 10A58WLXXK | PROCUREMENT, LIVER OF SPLIT CADAVER DONOR LIVER                                                         |
| 10A59DAAD  | DESTRUCTION, LIVER ENDOSCOPIC [ABDOMINAL] APPROACH USING CRYOPROBE                                      |
| 10A59DAAG  | DESTRUCTION, LIVER ENDOSCOPIC [ABDOMINAL] APPROACH USING LASER                                          |
| 10A59DAAW  | DESTRUCTION, LIVER ENDOSCOPIC [LAPAROSCOPIC] APPROACH USING RADIOFREQUENCY                              |
| 10A59DAGX  | DESTRUCTION, LIVER ENDOSCOPIC [ABDOMINAL] APPROACH USING DEVICE NEC                                     |
| 10A59DAX7  | DESTRUCTION, LIVER ENDOSCOPIC [ABDOMINAL] APPROACH USING CHEMICAL CAUTERY AGENT [E.G. ETHANOL]          |
| 10A59HAAW  | DESTRUCTION, LIVER PERCUTANEOUS APPROACH USING RADIOFREQUENCY                                           |
| 10A59HAX7  | DESTRUCTION, LIVER PERCUTANEOUS APPROACH USING CHEMICAL CAUTERY AGENT [E.G. ETHANOL]                    |
| 10A59LAAD  | DESTRUCTION, LIVER OPEN APPROACH USING CRYOPROBE                                                        |
| 10A59LAAG  | DESTRUCTION, LIVER OPEN APPROACH USING LASER                                                            |

|            |                                                                              |
|------------|------------------------------------------------------------------------------|
| 10A59LAAW  | DESTRUCTION, LIVER OPEN APPROACH USING RADIOFREQUENCY                        |
| 10A59LAGX  | DESTRUCTION, LIVER OPEN APPROACH USING DEVICE NEC                            |
| 10A59LAX7  | DESTRUCTION, LIVER OPEN APPROACH USING CHEMICAL CAUTERY AGENT [E.G. ETHANOL] |
| 10A74LA    | FIXATION, LIVER USING OPEN APPROACH                                          |
| 10A85LAXXK | TRANSPLANT, LIVER OF A CADAVER-DONOR FULL SIZE LIVER                         |
| 10A85VCXXK | TRANSPLANT, LIVER OF A CADAVER- DONOR MULTI-ORGAN LIVER WITH                 |
| 10A85WLXXJ | INTESTINE/ PANCREAS/SPLEEN/STOMACH [OR ANY COMBINATION OF]                   |
| 10A85WLXXK | TRANSPLANT, LIVER OF A LIVING-DONOR SPLIT LIVER                              |
| 10A87DA    | TRANSPLANT, LIVER OF A CADAVER-DONOR SPLIT LIVER (OR REDUCED                 |
| 10A87LA    | ÓPAEDIATRICÖ SIZE LIVER)                                                     |
| 10A87LAAZ  | EXCISION PARTIAL, LIVER USING ENDOSCOPIC (LAPAROSCOPIC)APPROACH              |
| 20A71DA    | EXCISION PARTIAL, LIVER USING OPEN APPROACH                                  |
| 20A71GR    | EXCISION PARTIAL, LIVER USING ULTRASONIC ASPIRATOR DEVICE (FOR               |
| 20A71HA    | DISSECTION) AND OPEN APPROACH                                                |
| 20A71LA    | BIOPSY, LIVER USING ENDOSCOPIC [LAPAROSCOPIC] APPROACH                       |
| 30A10WX    | BIOPSY, LIVER USING PERCUTANEOUS TRANSLUMINAL VENOUS APPROACH                |
| 30A30DA    | BIOPSY, LIVER USING PERCUTANEOUS (NEEDLE) APPROACH                           |
| 30A30DB    | BIOPSY, LIVER USING OPEN APPROACH                                            |
| 30A30DC    | XRAY, LIVER FOLLOWING CATHETER (INFUSION PUMP) INJECTION OF                  |
| 30A30DD    | CONTRAST                                                                     |
| 30A30HA    | ULTRASOUND, LIVER WITH ULTRASOUND ALONE                                      |
| 30A70CA    | ULTRASOUND, LIVER WITH ULTRASOUND AND COLOR FLOW                             |
| 30A70CC    | ULTRASOUND, LIVER WITH ULTRASOUND AND DOPPLER                                |
| 30A70CE    | ULTRASOUND, LIVER WITH ULTRASOUND, COLOR FLOW AND DOPPLER                    |
| 30C30DA    | ULTRASOUND, LIVER ENDOSCOPIC [EUS]                                           |
| 30C30DB    | DIAGNOSTIC NUCLEAR (IMAGING) STUDY, LIVER USING SCINTIGRAPHY                 |
| 30C30DC    | DIAGNOSTIC NUCLEAR (IMAGING) STUDY, LIVER USING SPECT                        |
| 30C30DD    | TOMOGRAPHY                                                                   |
| 30C70CA    | DIAGNOSTIC NUCLEAR (IMAGING) STUDY, LIVER USING PET TOMOGRAPHY               |
| 30C70CB    | ULTRASOUND, LIVER WITH SPLEEN WITH ULTRASOUND ALONE                          |
| 30C70CC    | ULTRASOUND, LIVER WITH SPLEEN WITH ULTRASOUND AND COLOR FLOW                 |
| 30C70CD    | ULTRASOUND, LIVER WITH SPLEEN WITH ULTRASOUND AND DOPPLER                    |
| 30C70CE    | ULTRASOUND, LIVER WITH SPLEEN WITH ULTRASOUND, COLOR FLOW AND                |
| 30C70KR    | DOPPLER                                                                      |
| 30C70KS    | DIAGNOSTIC NUCLEAR (IMAGING) STUDY, LIVER WITH SPLEEN USING                  |
|            | SCINTIGRAPHY                                                                 |
|            | DIAGNOSTIC NUCLEAR (IMAGING) STUDY, LIVER WITH SPLEEN USING                  |
|            | SCINTIGRAPHY WITH VASCULAR FLOW                                              |
|            | DIAGNOSTIC NUCLEAR (IMAGING) STUDY, LIVER WITH SPLEEN USING                  |
|            | SPECT TOMOGRAPHY                                                             |
|            | DIAGNOSTIC NUCLEAR (IMAGING) STUDY, LIVER WITH SPLEEN USING SPEC             |
|            | TOMOGRAPHY (SPECT) WITH VASCULAR FLOW                                        |
|            | DIAGNOSTIC NUCLEAR (IMAGING) STUDY, LIVER WITH SPLEEN USING PET              |
|            | TOMOGRAPHY                                                                   |
|            | DIAGNOSTIC NUCLEAR (IMAGING) STUDY, LIVER WITH SPLEEN WITH BLOOD             |
|            | POOL IMAGING AND VASCULAR FLOW                                               |
|            | DIAGNOSTIC NUCLEAR (IMAGING) STUDY, LIVER WITH SPLEEN WITH BLOOD             |
|            | POOL IMAGING AND SPEC TOMOGRAPHY (SPECT)                                     |
